# Supplementary material for: High specific energy supercapacitor electrode prepared from MnS/Ni3S2 composite grown on nickel foam
Source: Royal Society of Chemistry journal article supplement (doi:10.1039/d1nj03930j), 2021-01-01
Supplement: d1nj03930j1.pdf [file d1nj03930j1.pdf]

## Supplementary Information

### **High Specific Energy Supercapacitor Electrode Prepared from MnS/Ni<sub>3</sub>S<sub>2</sub> Composite Grown on Nickel Foam.**

Aya Mohamed<sup>a</sup>, N. S. Tantawy<sup>a</sup>, S.S. Mahmoud<sup>a</sup>, M. A. Shoeib<sup>b</sup> and Saad G. Mohamed<sup>c\*</sup>.

<sup>a</sup>Chemistry Department, Faculty of Women for Arts, Science and Education, Ain Shams University, Cairo, Egypt

<sup>b</sup>Department of Surface Technology and Corrosion Protection, Central Metallurgical Researches and Development Institute, CMRDI, P. O. Box: 87, Helwan, Cairo, Egypt

<sup>c</sup>Mining and Metallurgy Engineering Department, Tabbin Institute for Metallurgical Studies (TIMS), Tabbin, Helwan 109, Cairo 11421, Egypt

\*Corresponding author Email address: saadmohamed@tims.gov.eg (S. G. Mohamed)

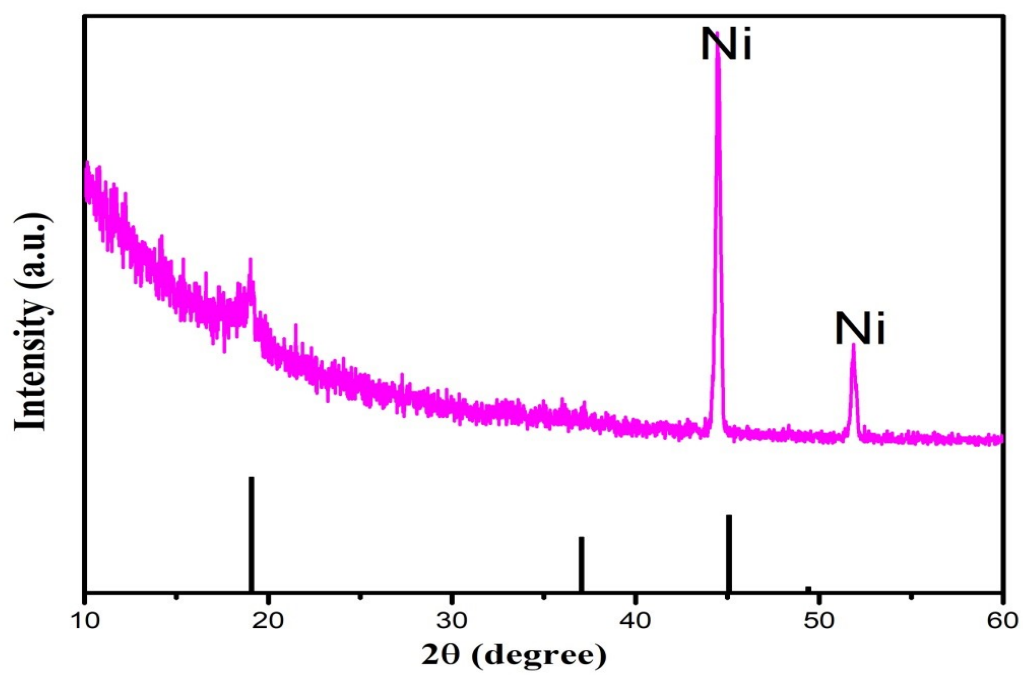

Fig. S1. XRD pattern of MnO<sub>2</sub> on nickel foam reference card [JCPDS 42-1169].

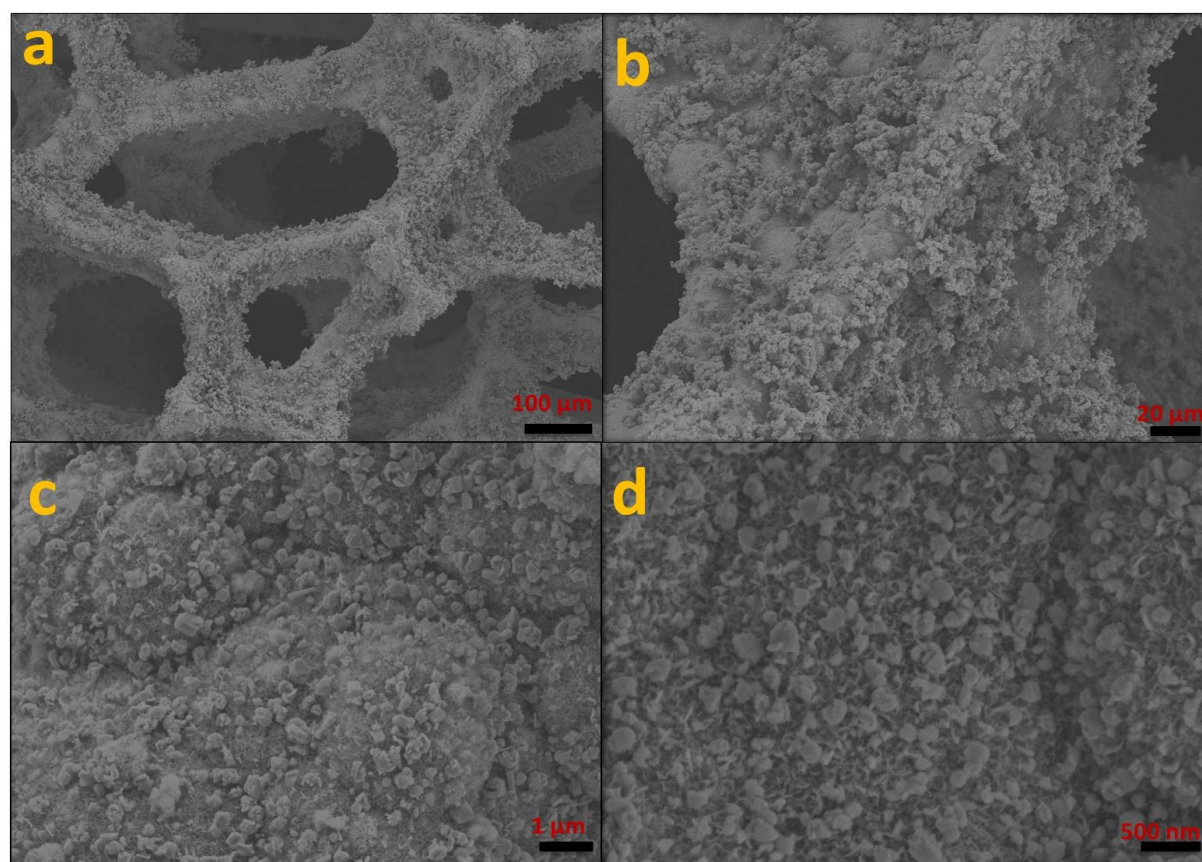

Fig. S2 SEM images of MnO<sub>2</sub>.

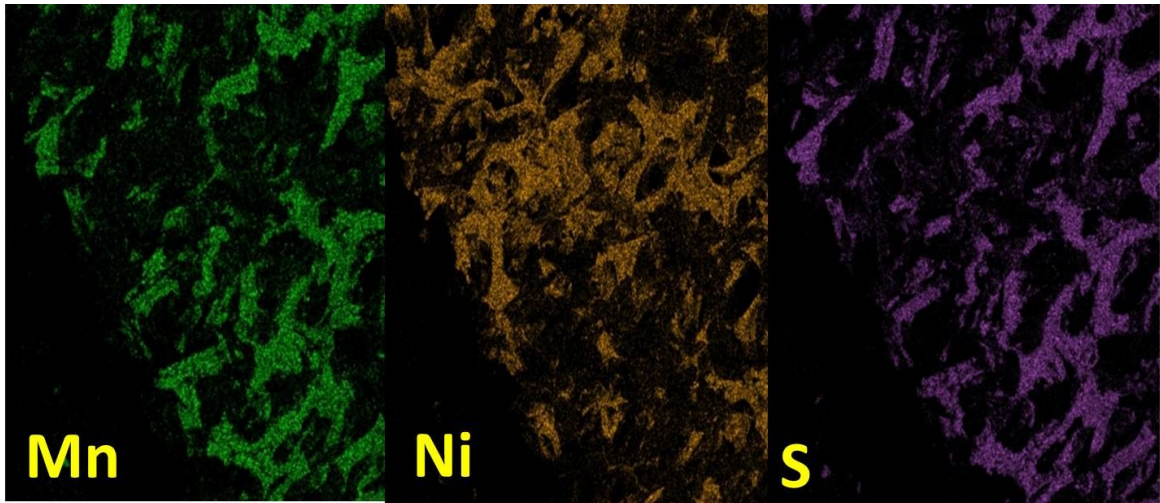

Fig. S3 EDX images of MNE electrode.

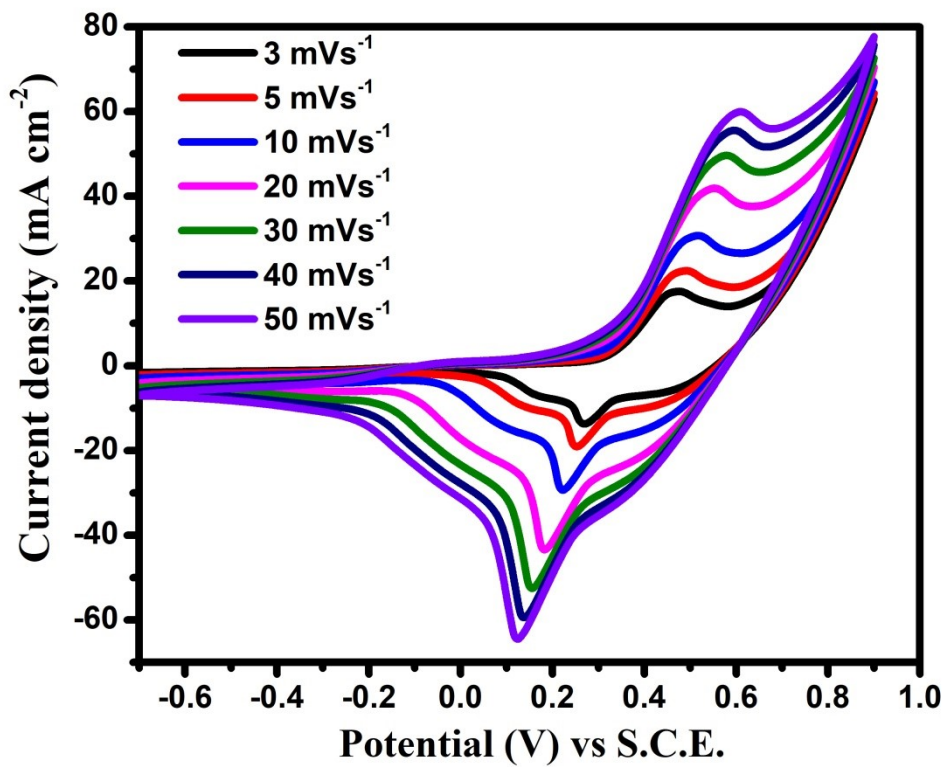

Fig. S4 CV curves at different scan rates of MnO<sub>2</sub>.

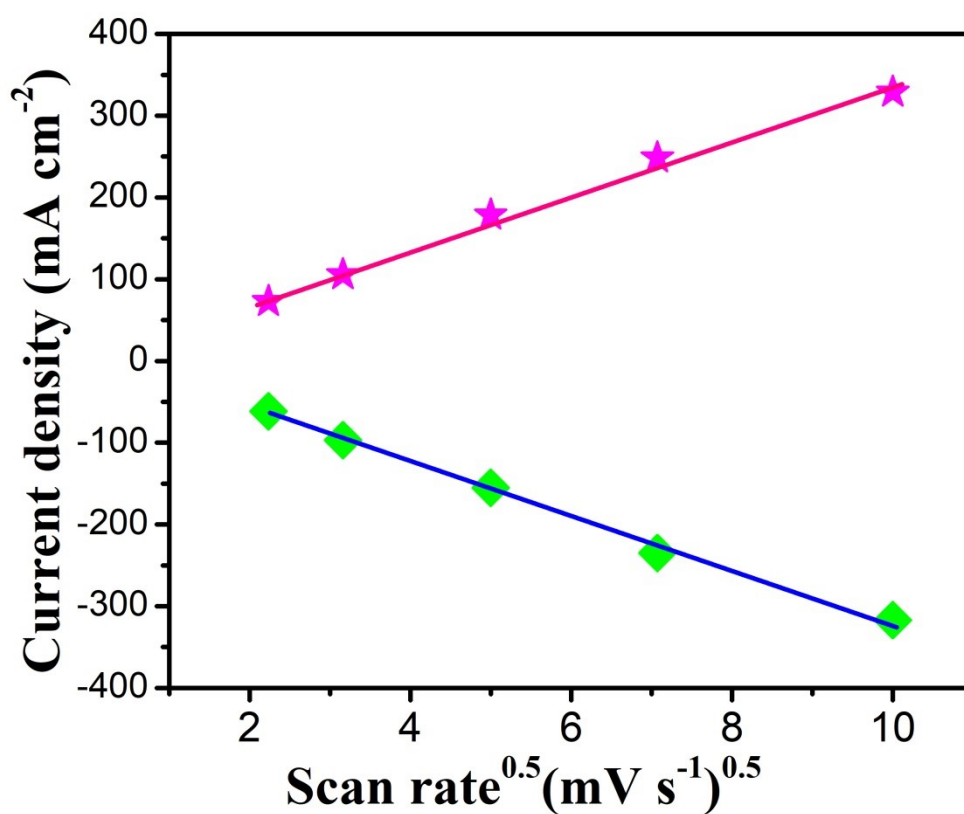

Fig. S5 peak current density as a function of the square root of the scan rate  $v$ .

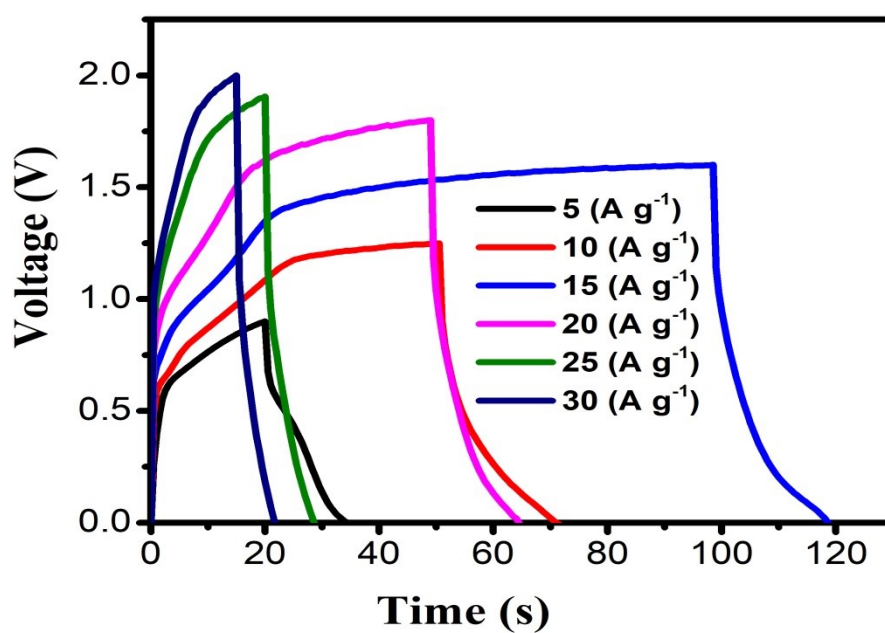

Fig. S6 GCD curves at multiple voltage windows.

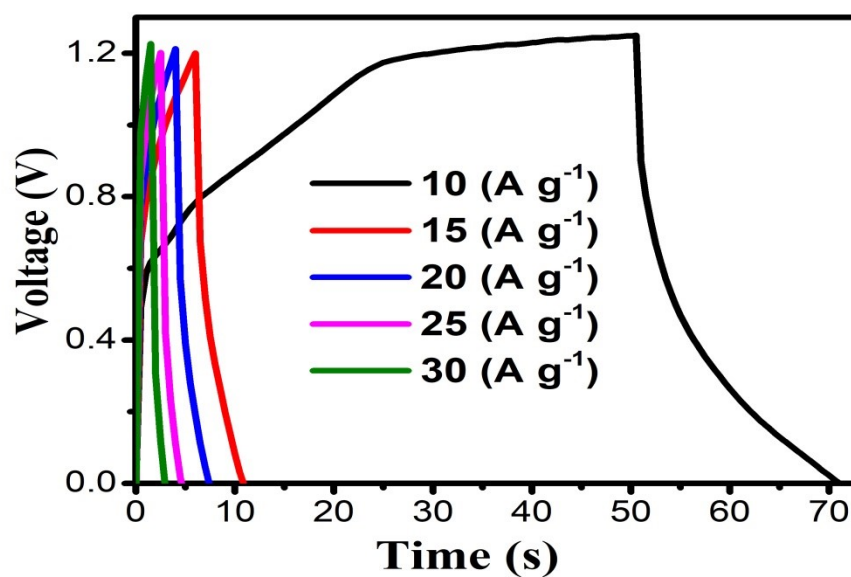

Fig. S7 GCD curves at voltage windows 1.2 V.

**Table S1.** Capacity values at different scan rates calculated from CV curves of MNE electrode.

| scan rate<br>(mV s <sup>-1</sup> ) | capacity<br>(mAh cm <sup>-2</sup> ) | surface<br>contribution% | Non-surface<br>contribution% |
|------------------------------------|-------------------------------------|--------------------------|------------------------------|
| 5                                  | 352.5                               | 34.0                     | 66.0                         |
| 10                                 | 294.6                               | 40.7                     | 59.3                         |
| 25                                 | 242.4                               | 49.5                     | 50.5                         |
| 50                                 | 191.1                               | 62.8                     | 37.2                         |
| 100                                | 126.6                               | 94.8                     | 5.2                          |

**Table S2.** Areal capacity and capacitance at different current densities calculated from GCD curves of MNE electrode and its comparison with previous works.

| Current density           | Capacity                       | Capacitance                  | reference |
|---------------------------|--------------------------------|------------------------------|-----------|
| 3 (mA cm <sup>-2</sup> )  | 796.7 (mA h cm <sup>-2</sup> ) | 2390.0 (F cm <sup>-2</sup> ) | This work |
| 5 (mA cm <sup>-2</sup> )  | 651.2 (mA h cm <sup>-2</sup> ) | 1953.5 (F cm <sup>-2</sup> ) | This work |
| 7 (mA cm <sup>-2</sup> )  | 582.0 (mA h cm <sup>-2</sup> ) | 1746.0 (F cm <sup>-2</sup> ) | This work |
| 10 (mA cm <sup>-2</sup> ) | 522.7 (mAh cm <sup>-2</sup> )  | 1568.0 (F cm <sup>-2</sup> ) | This work |
| 15 (mA cm <sup>-2</sup> ) | 454.5 (mA h cm <sup>-2</sup> ) | 1363.5 (F cm <sup>-2</sup> ) | This work |
| 20 (mA cm <sup>-2</sup> ) | 409.3 (mA h cm <sup>-2</sup> ) | 1227.8 (F cm <sup>-2</sup> ) | This work |
| 25 (mA cm <sup>-2</sup> ) | 357.3 (mA h cm <sup>-2</sup> ) | 1071.9 (F cm <sup>-2</sup> ) | This work |
| 1 (A g <sup>-1</sup> )    | --                             | 1722 (F g <sup>-1</sup> )    | Ref.1     |
| 2 (A g <sup>-1</sup> )    | 316.8 (mA h g <sup>-1</sup> )  | --                           | Ref. 2    |
| 2 (A g <sup>-1</sup> )    | ----                           | 373.52 (F g <sup>-1</sup> )  | Ref. 3    |
| 1 (A g <sup>-1</sup> )    | ----                           | 547.6 (F g <sup>-1</sup> )   | Ref. 4    |
| 1 (A g <sup>-1</sup> )    | 796 (C g <sup>-1</sup> )       | 2393 (F g <sup>-1</sup> )    | Ref..5    |

**Table S3.** Specific energy and specific power at different current densities and potential windows, calculated from GCD curves of the hybrid device.

| Current density (mA cm <sup>-2</sup> ) | Potential window (V) | Time (s) | Specific energy (Wh kg <sup>-1</sup> ) | Specific power (W kg <sup>-1</sup> ) |
|----------------------------------------|----------------------|----------|----------------------------------------|--------------------------------------|
| 30                                     | 2                    | 7.0      | 58.3                                   | 30000                                |
| 35                                     | 2                    | 4.7      | 45.7                                   | 35000                                |
| 40                                     | 2                    | 3.8      | 42.2                                   | 40000                                |
| 45                                     | 2                    | 3.0      | 37.5                                   | 45000                                |
| 50                                     | 2                    | 2.4      | 33.3                                   | 50000                                |
| 25                                     | 1.9                  | 8.7      | 57.4                                   | 23750                                |
| 30                                     | 1.9                  | 6.0      | 47.5                                   | 28500                                |
| 35                                     | 1.9                  | 4.3      | 39.7                                   | 33250                                |
| 20                                     | 1.8                  | 15.5     | 77.5                                   | 18000                                |
| 25                                     | 1.8                  | 8.0      | 50.0                                   | 22500                                |
| 30                                     | 1.8                  | 5.5      | 41.3                                   | 27000                                |
| 35                                     | 1.8                  | 3.7      | 32.4                                   | 31500                                |
| 15                                     | 1.6                  | 20.8     | 69.3                                   | 12000                                |
| 20                                     | 1.6                  | 7.7      | 34.2                                   | 16000                                |
| 25                                     | 1.6                  | 5.8      | 32.2                                   | 20000                                |
| 30                                     | 1.6                  | 4.1      | 27.3                                   | 24000                                |
| 35                                     | 1.6                  | 3.2      | 24.9                                   | 28000                                |
| 5                                      | 0.95                 | 14.5     | 9.6                                    | 2375                                 |
| 10                                     | 1.2                  | 22.0     | 36.7                                   | 6000                                 |
| 15                                     | 1.2                  | 5.8      | 14.5                                   | 9000                                 |

|    |     |     |      |       |
|----|-----|-----|------|-------|
| 20 | 1.2 | 4.0 | 13.3 | 12000 |
| 25 | 1.2 | 2.5 | 10.4 | 15000 |
| 30 | 1.2 | 1.5 | 7.5  | 18000 |

## **References**

1. Mohamed, S. G.; Hussain, I.; Shim, J.-J. *Nanoscale* **2018**, *10*, 6620-6628
2. Anil Kumar, Y.; Dasha Kumar, K.; Kim, H.-J. *Dalton Transactions* **2020**, *49*, (13), 4050-4059.
3. Kumar, M.; Jeong, D. I.; Sarwar, N.; Yoon, D. H. *Ceramics International* **2021**, *47*, (12), 16852-16860
4. Guanggao, Z.; Menglai, K.; Yadong, Y.; Lu, L.; Minglei, Y.; Xiaoming, L.; Guangfu, Y.; Zhongbing, H.; Abdullah, M. A.; Xuping, S. *Nanotechnology* **2017**, *28*, (6), 065402.
5. Attia, S. Y.; Barakat, Y. F.; Hassan, H. H.; Mohamed, S. G. *Journal of Energy Storage* **2020**, *29*, 101349.
